# Supplementary material for: Sorption Constant of Bisphenol A and Octylphenol Onto Size-Fractioned Dissolved Organic Matter Using a Fluorescence Method
Source: MDPI journal article supplement (doi:10.3390/ijerph18031102), 2021-01-27
Supplement: s1 [file s1]

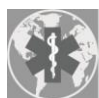

## Supplementary Materials

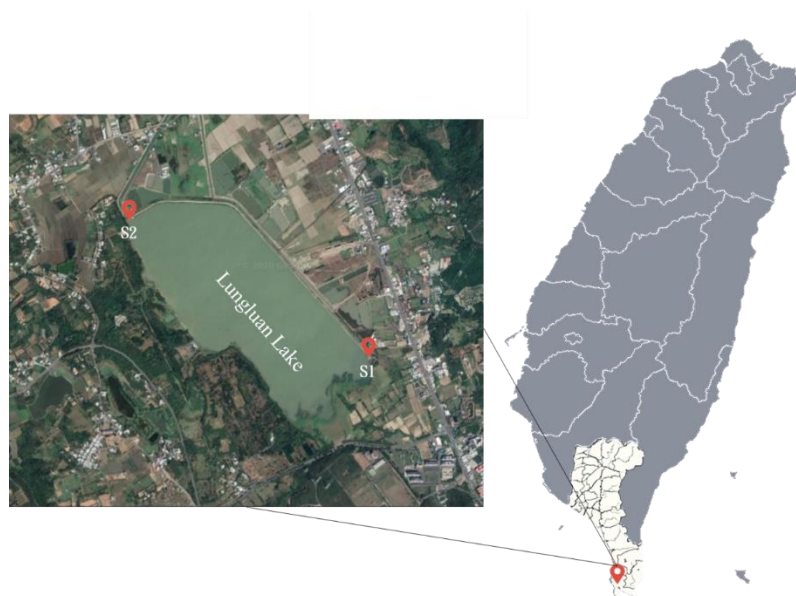

**Figure S1.** Sampling map.

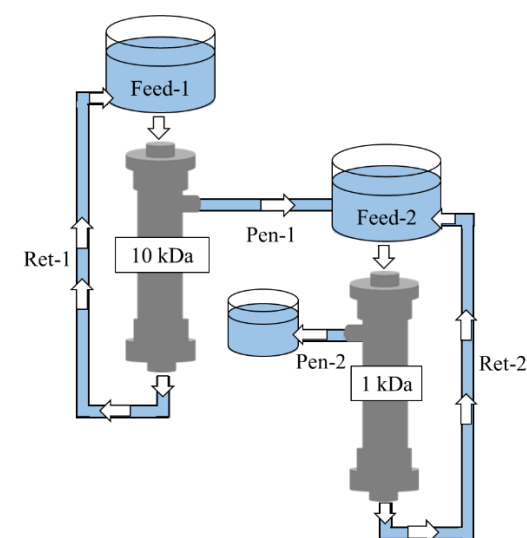

| Size    | Feed                | Retention               | Penetration                |
|---------|---------------------|-------------------------|----------------------------|
| 100 kDa | 3000 mL<br>(Feed-1) | 300 mL<br>(Ret-1, HDOM) | 2700 mL<br>(Pen-1, Feed-2) |
| 1 kDa   | 2700 mL<br>(Feed-2) | 270 mL<br>(Ret-2, MDOM) | 2430 mL<br>(Pen-2, LDOM)   |

**Figure S2.** Separation process and volumes of sized DOM.

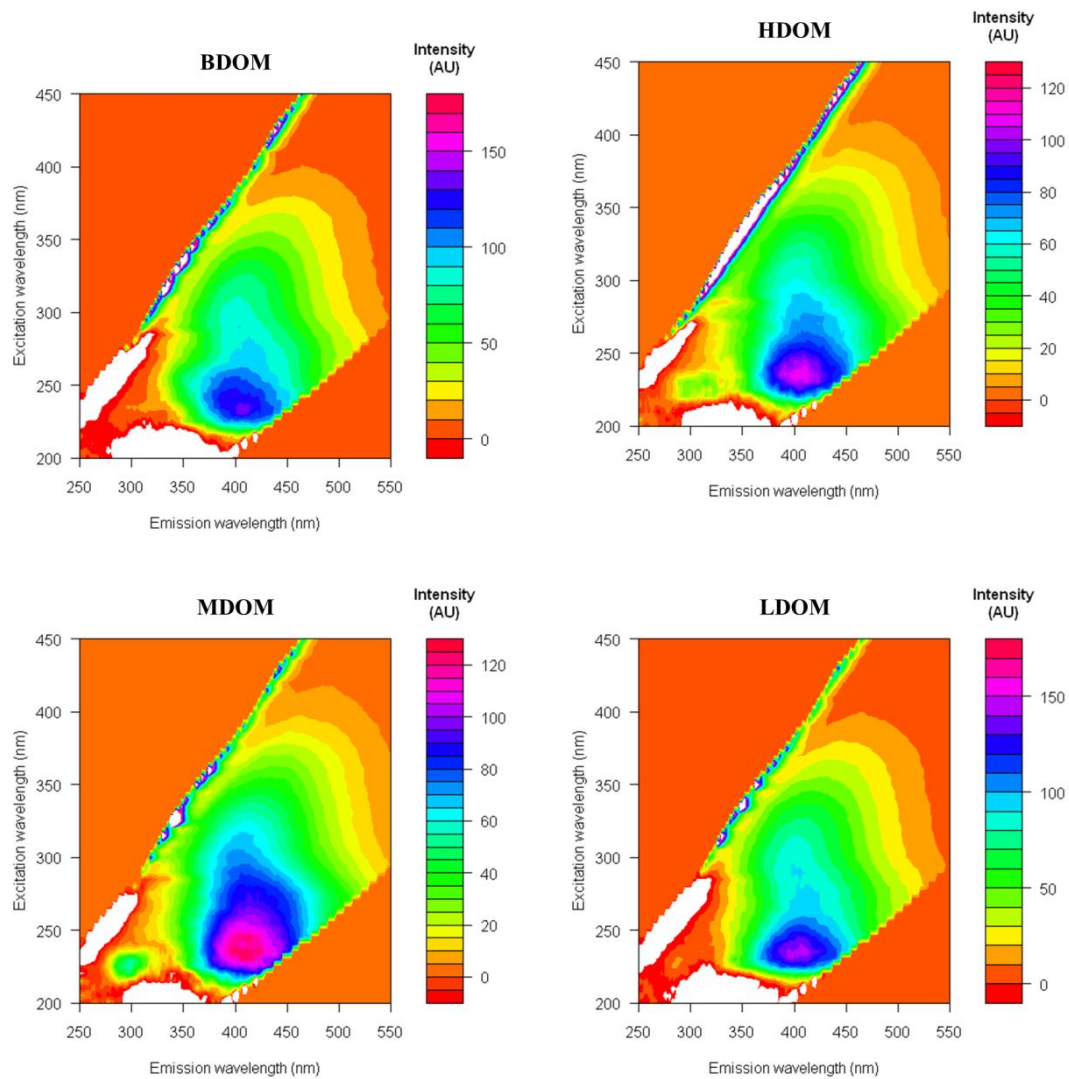

**Figure S3.** EEM plots of 4 sized DOM without OP and BPA at DOC 1 mg/L.

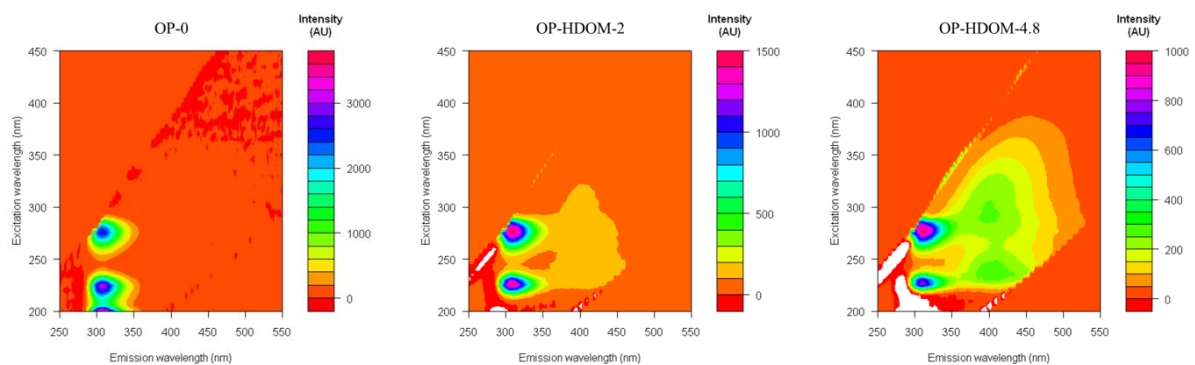

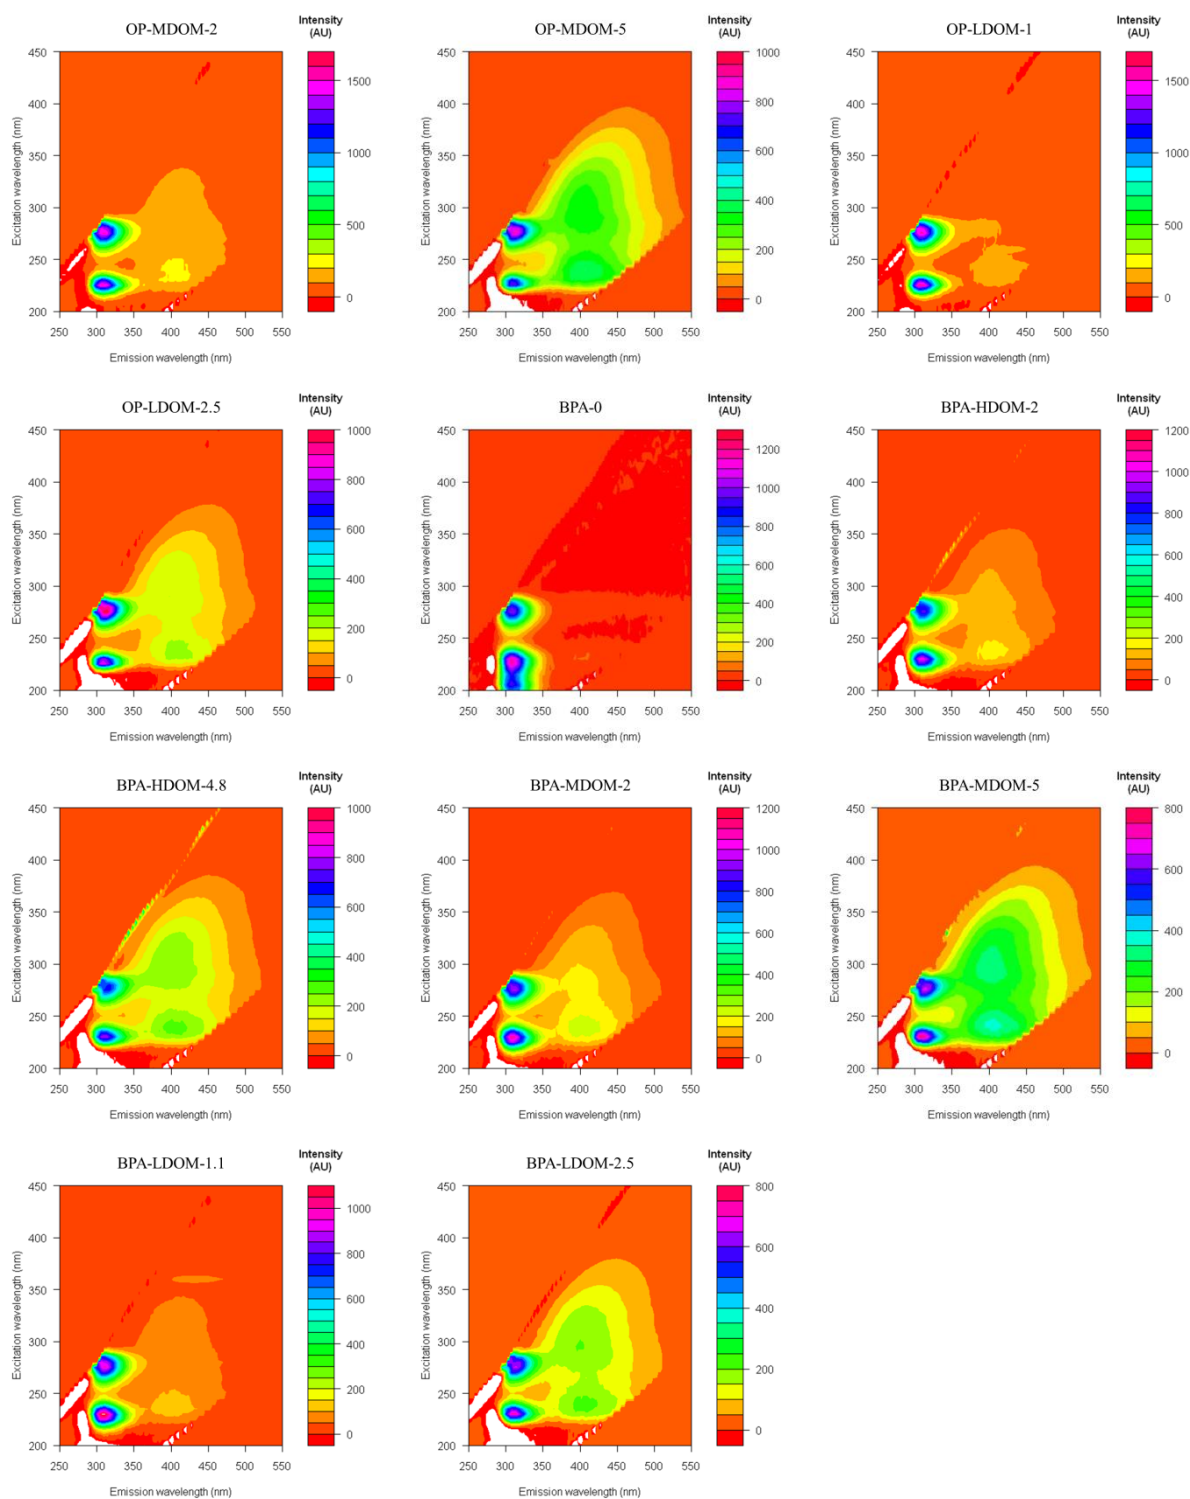

**Figure S4.** EEM plots of OP/BPA interaction with size-fractionated DOM. In the top of EEM, OP-0 and BPA-0 were the EEM plots of standard OP/BPA solution (1 mg/L). The size-fractions DOM were represented with HDOM, MDOM, and LDOM. The numbers were the DOC concentrations.
